# Supplementary material for: Family with Sequence Similarity 60A (FAM60A) Protein Is a Cell Cycle-fluctuating Regulator of the SIN3-HDAC1 Histone Deacetylase Complex
Source: PubMed Central journal article supplement — J Biol Chem. 2012 Aug 3;287(39):32346–53. doi: 10.1074/jbc.M112.382499 (PMC3463326; doi:10.1074/jbc.m112.382499), 2012-08-03
Supplement: supp_M112.382499_jbc.M112.382499-1.pdf [file supp_M112.382499_jbc.M112.382499-1.pdf]

|                        | C16 | C19                           |                   | C53      | C56       |                  |                      |    |
|------------------------|-----|-------------------------------|-------------------|----------|-----------|------------------|----------------------|----|
| <i>H.sapiens</i>       | 1   | MFCFHKPKMYRSIEGCCICRAKSSSSRFT | DSKRYEKDFQSCFGLHE | ..TRSCD  | ICNACVLLV | KRWKKLEPAGSKKNWN | HVVDARAGPSLKTTLKPKKV | 95 |
| <i>M.musculus</i>      | 1   | MFCFHKPKMYRSIEGCCICRAKSSSSRFT | DSKRYEKDFQSCFGLHE | ..TRSCD  | ICNACVLLV | KRWKKLEPAGSKKNWN | HVVDARAGPSLKTTLKPKKV | 95 |
| <i>G.gallus</i>        | 1   | MFCFHKPKMYRSIEGCCICRAKSSSSRFT | DSKRYEKDFQSCFGLHE | ..ARSCD  | ICNACVLLV | KRWKKLEPAGSKKNWN | HVVDARAGPSLKTTLKPKKM | 95 |
| <i>X.laevis</i>        | 1   | MICFYKPKTYRSITGCCICRAKSSSSRFT | DSRRYEGDFQSCFGLHE | ..SRSCD  | ICNACVLLV | KRWKKLEPAGSKKNWN | HVVDARAGPSLKTTLKPKKV | 95 |
| <i>D.rerio</i>         | 1   | MFCFHKPKMYRSIEGCCICRAKSSSSRFT | DSRYEENRFLCFGLSE  | ..DRVCD  | ICNACVLLV | KRWKKLEPAGSKKNWN | HVVDARAGPSLKTTLKPKKV | 95 |
| <i>B.floridae</i>      | 1   | MFSFHKPKVYRSISGCCICRAKSSSSRFT | DSKRYEVEFQKCBGLHE | ..ERSGD  | ICNACVLLV | KRWKKLEPAGSKKNWN | HVVDARAGPSLKTTLKPKKV | 95 |
| <i>S.kowalevskii</i>   | 1   | MFSFHKPKVYRSISGCCICRAKSSSSRFT | DSKRYEVEFQKCBGLHE | ..KRTGD  | ICNACVLLV | KRWKKLEPAGSKKNWN | HVVDARAGPSLKTTLKPKKV | 95 |
| <i>S.purpuratus</i>    | 1   | MFSFHKPKVYRSISGCCICRAKSSSSRFT | DSKRYEVEFQKCBGLHE | ..KRTGD  | ICNACVLLV | KRWKKLEPAGSKKNWN | HVVDARAGPSLKTTLKPKKV | 95 |
| <i>L.gigantea</i>      | 1   | MFSFHKPKVYRSISGCCICRAKSSSSRFT | DSKRYEVEFQKCBGLHE | ..KRTGD  | ICNACVLLV | KRWKKLEPAGSKKNWN | HVVDARAGPSLKTTLKPKKV | 95 |
| <i>C.teleta</i>        | 1   | MFSFHKPKVYRSISGCCICRAKSSSSRFT | DSKRYEVEFQKCBGLHE | ..KRTGD  | ICNACVLLV | KRWKKLEPAGSKKNWN | HVVDARAGPSLKTTLKPKKV | 95 |
| <i>D.pulex</i>         | 1   | MFSFHKPKVYRSISGCCICRAKSSSSRFT | DSKRYEVEFQKCBGLHE | ..KRTGD  | ICNACVLLV | KRWKKLEPAGSKKNWN | HVVDARAGPSLKTTLKPKKV | 95 |
| <i>L.vannamei</i>      | 1   | MFSFHKPKVYRSISGCCICRAKSSSSRFT | DSKRYEVEFQKCBGLHE | ..KRTGD  | ICNACVLLV | KRWKKLEPAGSKKNWN | HVVDARAGPSLKTTLKPKKV | 95 |
| <i>I.scapularis</i>    | 1   | MFSFHKPKVYRSISGCCICRAKSSSSRFT | DSKRYEVEFQKCBGLHE | ..KRTGD  | ICNACVLLV | KRWKKLEPAGSKKNWN | HVVDARAGPSLKTTLKPKKV | 95 |
| <i>A.mellifera</i>     | 1   | MFSFHKPKVYRSISGCCICRAKSSSSRFT | DSKRYEVEFQKCBGLHE | ..KRTGD  | ICNACVLLV | KRWKKLEPAGSKKNWN | HVVDARAGPSLKTTLKPKKV | 95 |
| <i>N.vitripennis</i>   | 1   | MFSFHKPKVYRSISGCCICRAKSSSSRFT | DSKRYEVEFQKCBGLHE | ..KRTGD  | ICNACVLLV | KRWKKLEPAGSKKNWN | HVVDARAGPSLKTTLKPKKV | 95 |
| <i>H.saltator</i>      | 1   | MFSFHKPKVYRSISGCCICRAKSSSSRFT | DSKRYEVEFQKCBGLHE | ..KRTGD  | ICNACVLLV | KRWKKLEPAGSKKNWN | HVVDARAGPSLKTTLKPKKV | 95 |
| <i>P.humanus</i>       | 1   | MFSFHKPKVYRSISGCCICRAKSSSSRFT | DSKRYEVEFQKCBGLHE | ..KRTGD  | ICNACVLLV | KRWKKLEPAGSKKNWN | HVVDARAGPSLKTTLKPKKV | 95 |
| <i>T.castaneum</i>     | 1   | MFSFHKPKVYRSISGCCICRAKSSSSRFT | DSKRYEVEFQKCBGLHE | ..KRTGD  | ICNACVLLV | KRWKKLEPAGSKKNWN | HVVDARAGPSLKTTLKPKKV | 95 |
| <i>D.melanogaster</i>  | 1   | MFSFHKPKVYRSISGCCICRAKSSSSRFT | DSKRYEVEFQKCBGLHE | ..KRTGD  | ICNACVLLV | KRWKKLEPAGSKKNWN | HVVDARAGPSLKTTLKPKKV | 95 |
| <i>D.pseudoobscura</i> | 1   | MFSFHKPKVYRSISGCCICRAKSSSSRFT | DSKRYEVEFQKCBGLHE | ..KRTGD  | ICNACVLLV | KRWKKLEPAGSKKNWN | HVVDARAGPSLKTTLKPKKV | 95 |
| <i>N.vectensis</i>     | 1   | MFSFHKPKVYRSISGCCICRAKSSSSRFT | DSKRYEVEFQKCBGLHE | ..KRTGD  | ICNACVLLV | KRWKKLEPAGSKKNWN | HVVDARAGPSLKTTLKPKKV | 95 |
| <i>S.mansoni</i>       | 1   | .....MSQLGCCICGTRKSSSSRFT     | DSRYAEHFGACGFPQG  | ..ITRSCD | ICNACVLLV | KRWKKLEPAGSKKNWN | HVVDARAGPSLKTTLKPKKV | 85 |
