# Supplementary figures and images for: Family with Sequence Similarity 60A (FAM60A) Protein Is a Cell Cycle-fluctuating Regulator of the SIN3-HDAC1 Histone Deacetylase Complex
Source: PubMed Central journal article supplement — J Biol Chem. 2012 Aug 3;287(39):32346–53. doi: 10.1074/jbc.M112.382499 (PMC3463326; doi:10.1074/jbc.m112.382499), 2012-08-03

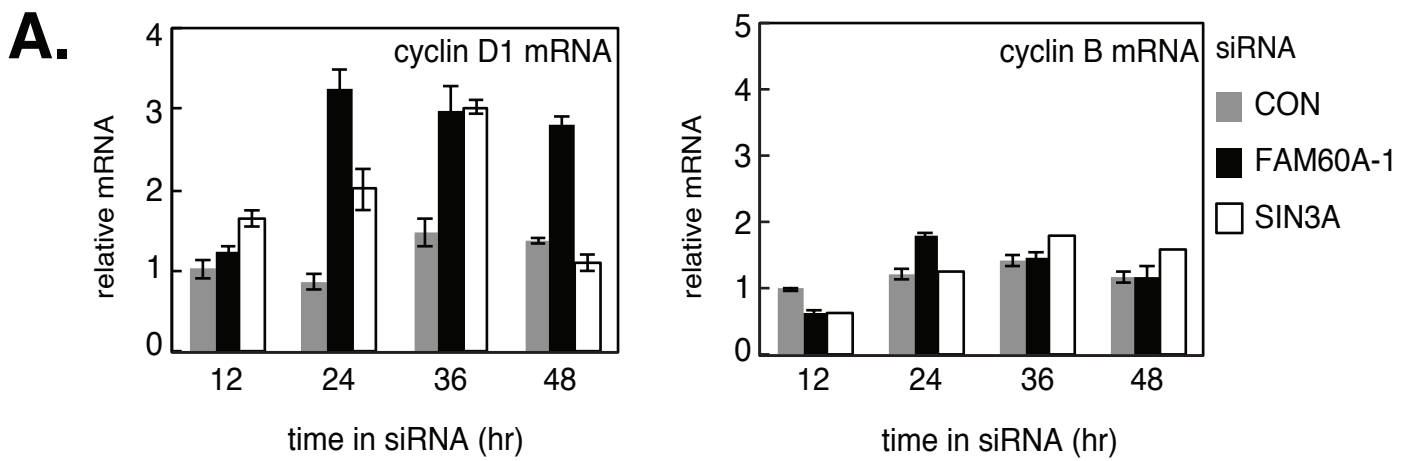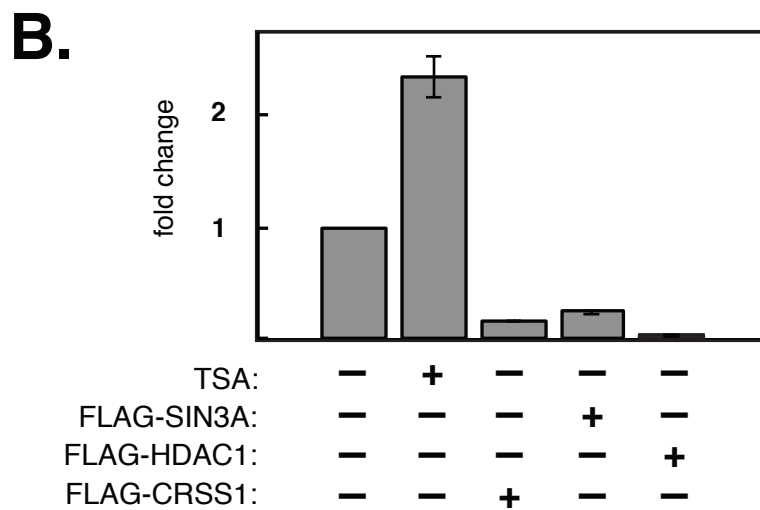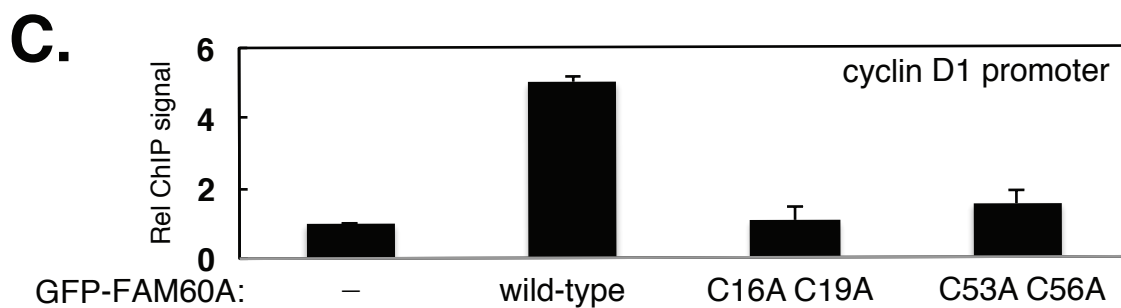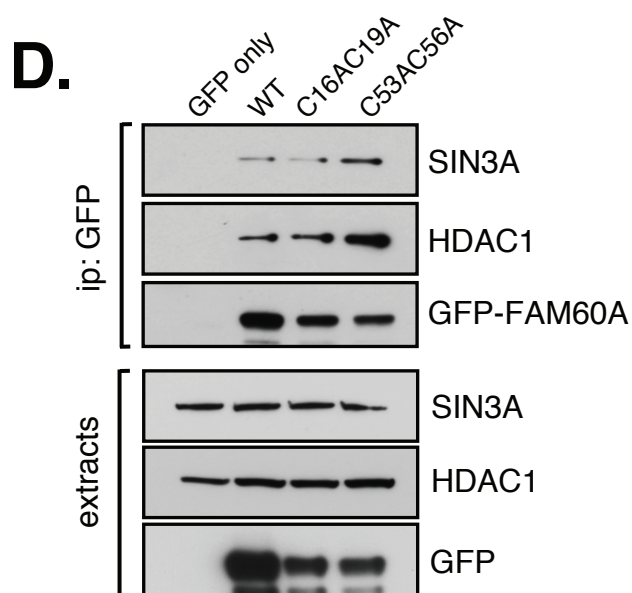

Supplement: supp_M112.382499_jbc.M112.382499-2.pdf [file supp_M112.382499_jbc.M112.382499-2.pdf]

**A.**

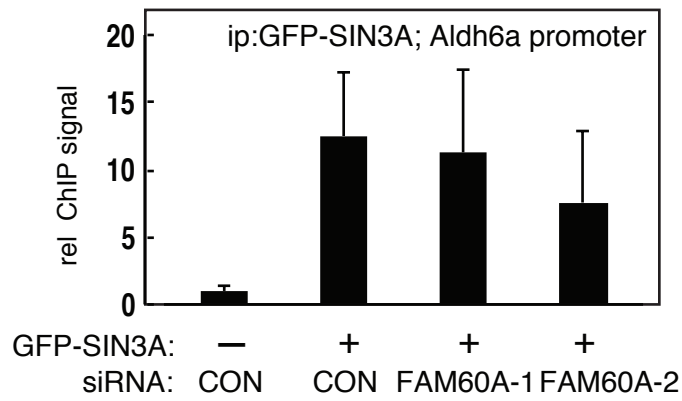

**B.**

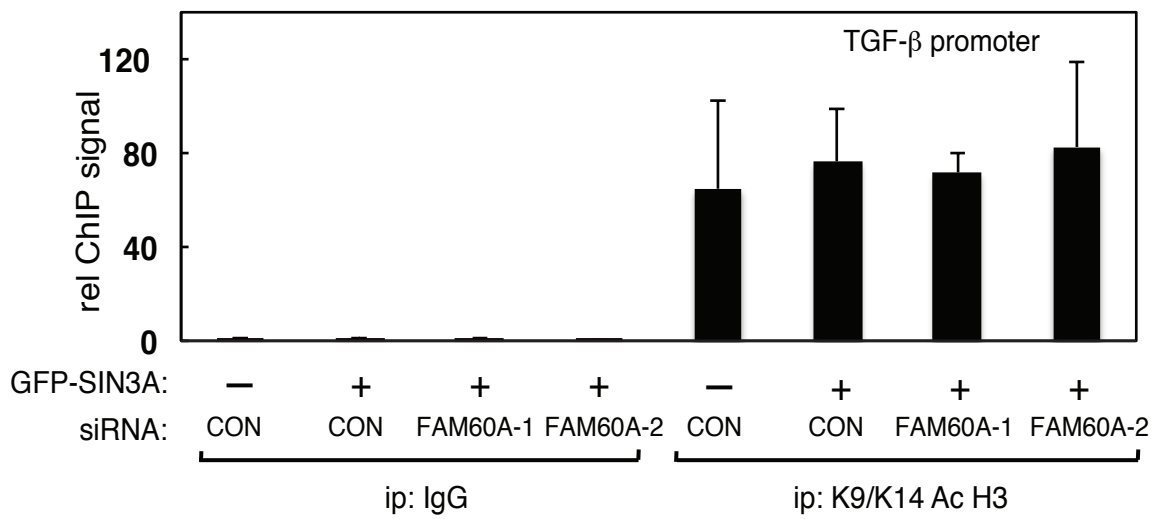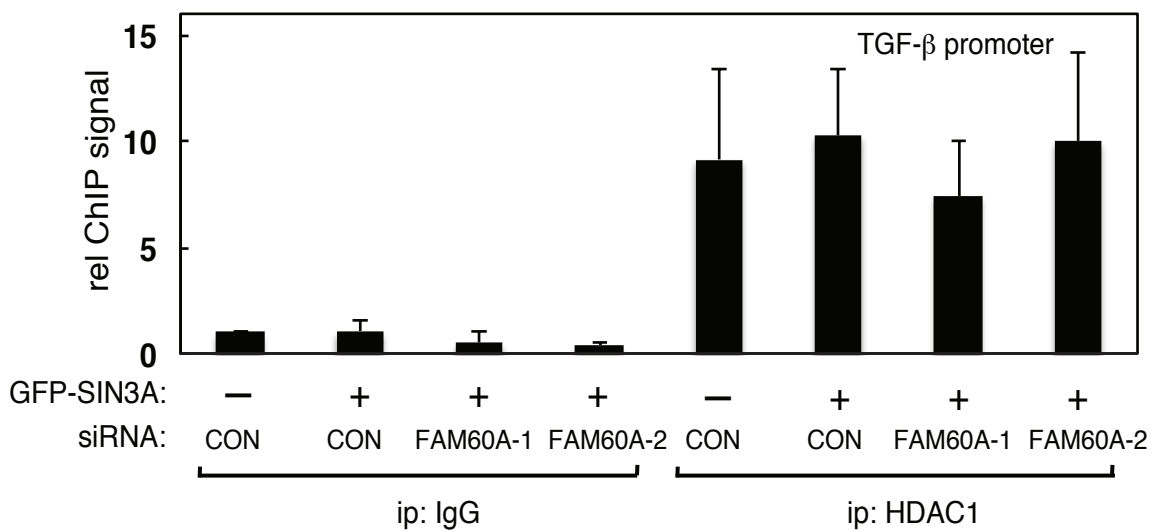

Supplement: supp_M112.382499_jbc.M112.382499-3.pdf [file supp_M112.382499_jbc.M112.382499-3.pdf]

**A.**

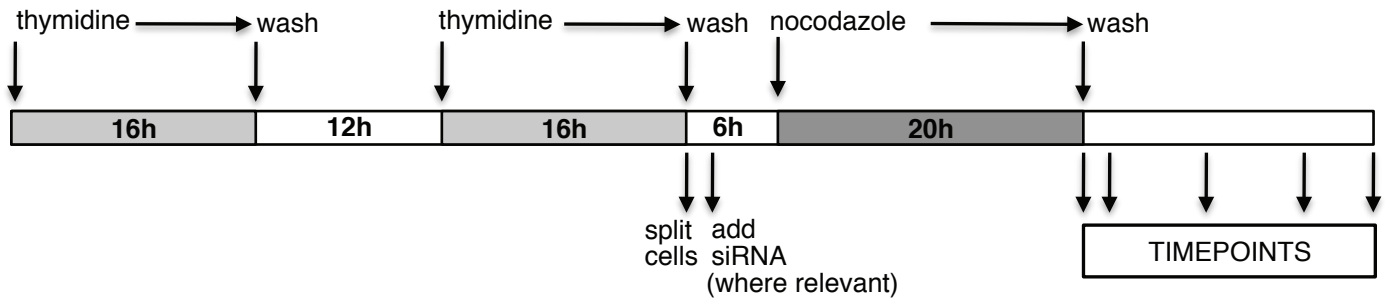

**B.**

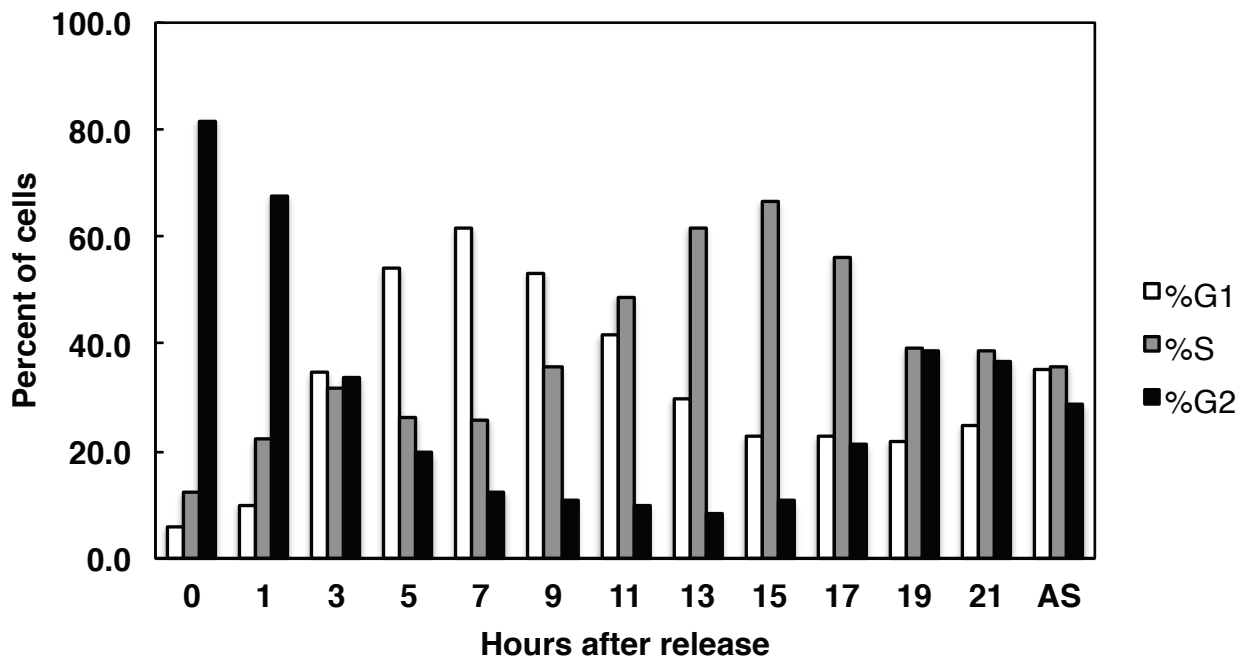

Supplement: supp_M112.382499_jbc.M112.382499-4.pdf [file supp_M112.382499_jbc.M112.382499-4.pdf]
